# Supplementary material for: Innovative Textiles Used in Face Masks: Filtration Efficiency and Self-Disinfecting Properties against Coronaviruses
Source: MDPI journal article supplement (doi:10.3390/nano11082088), 2021-08-17
Supplement: s1 [file s1]

# Innovative Textiles Used in Face Masks: Filtration Efficiency and Self-Disinfecting Properties against Coronaviruses

Paul Siller <sup>1</sup>, Janina Reissner <sup>1</sup>, Sabrina Hansen <sup>1</sup>, Michael Kühl <sup>1</sup>, Alexander Bartel <sup>2</sup>, David Schmelzeisen <sup>3</sup>, Thomas Gries <sup>3</sup>, Uwe Roesler <sup>1</sup> and Anika Frieze <sup>1,\*</sup>

**Table S1.** Characteristics of the nonwoven textiles.

| Name | Polymer | Production Method | Specific Weight [g/m <sup>2</sup> ] | Thickness [mm] | Air Permeability. Pressure Drop [Pa] at 95 l/min | Air Permeability. Pressure Drop [Pa] at 160 l/min |
|------|---------|-------------------|-------------------------------------|----------------|--------------------------------------------------|---------------------------------------------------|
| NF1  | PVDF    | electrospinning   | 6,27                                | 0.029          | 301.6                                            | 515.7                                             |
| NF2  | PVDF    | electrospinning   | 2,52                                | *              | 95                                               | 158.5                                             |
| MB30 | PP      | meltblown         | 29.29                               | 0.285          | 862.6                                            | 1466.0                                            |
| SB25 | PP      | spunbond          | 25.33                               | 0.255          | 19.4                                             | 36.8                                              |
| SBNF | PP      | spunbond          | 27.82                               | 0.224          | 38.6                                             | 71.0                                              |

NF: nanofleece; MB: meltblown; SB: spunbond; PVDF: Polyvinylidenfluorid; PP: Polypropylen; \*below measurement limit.

**Table S2.** Characteristics of the woven and knitted textiles.

|    | Name              | Type         | Material                   | Specific weight [g/m <sup>2</sup> ] | Thickness [mm] | Yarn Count       |                  |                          | Mesh Count |       |                        |
|----|-------------------|--------------|----------------------------|-------------------------------------|----------------|------------------|------------------|--------------------------|------------|-------|------------------------|
|    |                   |              |                            |                                     |                | Warp threads /cm | Weft threads /cm | Threads /cm <sup>2</sup> | MS/cm      | MR/cm | Meshes/cm <sup>2</sup> |
| A1 | Cotton Canvas 100 | Woven Canvas | Cotton                     | 101.04                              | 0,2            | 59               | 42               | 2450                     |            |       |                        |
| A2 | Cotton Canvas 100 | Woven Canvas | Cotton                     | 101.19                              | 0,205          |                  |                  | 2348                     |            |       |                        |
| C1 | Cotton Knit 180   | RL Knit      | Cotton                     | 187.24                              | 0,671          |                  |                  |                          | 14         | 20    | 272                    |
| C2 | Cotton Knit 180   | RL Knit      | Cotton                     | 172.87                              | 0,607          |                  |                  |                          | 14         | 19    | 264                    |
| F1 | Cotton Canvas 130 | Woven Canvas | Cotton                     | 130.91                              | 0,326          | 55               | 29               | 1584                     |            |       |                        |
| F2 | Cotton Canvas 130 | Woven Canvas | Cotton                     | 129.04                              | 0,315          | 54               | 28               | 1539                     |            |       |                        |
| F3 | Cotton Canvas 130 | Woven Canvas | Cotton                     | 131.99                              | 0,312          | 55               | 27               | 1511                     |            |       |                        |
| F4 | Cotton Canvas 130 | Woven Canvas | Cotton                     | 124.75                              | 0,284          | 55               | 28               | 1546                     |            |       |                        |
| H1 | PES Canvas 120    | Woven Canvas | Polyester 97%. Elasthan 3% | 122.45                              | 0,275          | 56               | 28               | 1535                     |            |       |                        |
| H2 | PES Canvas 120    | Woven Canvas | Polyester 97%. Elasthan 3% | 125.67                              | 0,277          | 55               | 29               | 1571                     |            |       |                        |
| M1 | Cotton Canvas 120 | Woven Canvas | Cotton                     | 122.31                              | 0,372          | 42               | 32               | 1329                     |            |       |                        |
| M2 | Cotton Canvas 120 | Woven Canvas | Cotton                     | 122.31                              | 0,372          | 42               | 32               | 1329                     |            |       |                        |
| N1 | PES Canvas 90     | Woven Canvas | Polyester                  | 92.11                               | 0,245          | 41               | 29               | 1203                     |            |       |                        |
| N2 | PES Canvas 90     | Woven Canvas | Polyester                  | 92.11                               | 0,245          | 41               | 29               | 1203                     |            |       |                        |

**Table S3.** CAS Numbers of substances used in treatments.

| Substance                                                                          | CAS #            |
|------------------------------------------------------------------------------------|------------------|
| Dimethyloctadecyl[3-(trimethoxysilyl)propyl]ammonium chloride (F2, F3, F4, M2, N2) | CAS 27668-52-6   |
| PolyHexaMethylene Biguanide                                                        | CAS 1802181-67-4 |
| Ethylene glycol                                                                    | CAS 107-21-1     |
| Dimethyloctadecyl[3-(trimethoxysilyl)propyl]ammonium chloride (H2)                 | CAS 41591-87-1   |
| Methanol                                                                           | CAS 67-56-1      |
| Dimethylmyristylamine                                                              | CAS 112-75-4     |
| N,N-Dimethyl-3-(trimethoxysilyl)propylamine                                        | CAS 2530-86-1    |
| Isotridecanol, branched, ethoxylated                                               | CAS 69011-36-5   |
| coco alkylbis(hydroxyethyl),ethoxylated, chlorides                                 | CAS 61791-10-4   |
| Alcohols C9-11 ethoxylates                                                         | CAS 68439-46-3   |
